# Supplementary material
Source: publisher site journal article supplement (https://www.dovepress.com/article/490457)

**Supplementary data**

**Supplemental Table S1** Primers used for qPCR

| **Gene Name** | **Forward Primer** | **Reverse Primer** |
| --- | --- | --- |
| PPP3CB | CGCGTCGTCAAAGCTGTTC | CCTGGGTATCCCATCCATATCAA |
| PDCD4 | CCACTGACCCTGACAATTTAAGC | TTTTCCGCAGTCGTCTTTTGG |
| PSMD8 | GGCATGTACGAGCAACTCAAG | GCTCAAGCAGAACCAACTTCA |
| AKT1 | ATGAACGACGTAGCCATTGTG | TTGTAGCCAATAAAGGTGCCAT |
| PSMA2 | GAGCGCGGTTACAGCTTCT | GCAGCTTTAATCCCCACTGAC |
| UACA | GCTGCGGAGCCAGATCAAA | CTCTCCAGCTCGACTTCACA |
| TNFRSF12A | GTGTTGGGATTCGGCTTGGT | GTCCATGCACTTGTCGAGGTC |
| DAPK2 | CTCGATGAGGAGCCCAAATATG | CCCGGCACTTCTTCACGAT |
| DSP | GGATTCTTCTAGGGAGACTCAGT | TCCACTCGTATTCCGTCTGGG |

**Supplemental Table S2** PANoptosis gene set

| **PANoptosis**  **gene set** | **REACTOME**  **PYROPTOSIS** | **KEGG APOPTOSIS** | **HALLMARKAPOPTOSIS** | **REACTOMEAPOPTOSIS** |
| --- | --- | --- | --- | --- |
| BAK1 | BAK1 | CASP10 | CASP3 | BAD |
| TP63 | TP63 | CASP9 | CASP9 | CFLAR |
| CHMP2B | CHMP2B | CASP8 | DFFA | PSMB1 |
| BAX | BAX | CASP7 | CASP7 | PSMC4 |
| GZMB | GZMB | CHUK | CFLAR | BID |
| CHMP4B | CHMP4B | PRKAR2B | BIRC3 | VIM |
| GSDMD | GSDMD | TNF | PMAIP1 | FAS |
| GSDME | GSDME | TNFSF10 | CASP8 | BAK1 |
| IL1A | IL1A | BIRC3 | JUN | DAPK2 |
| CHMP3 | CHMP3 | XIAP | BCL2L11 | CDH1 |
| IRF1 | IRF1 | PPP3R2 | MCL1 | PSMA4 |
| IL1B | IL1B | PPP3CC | IL1B | DSG2 |
| CHMP2A | CHMP2A | PPP3R1 | SPTAN1 | CASP8 |
| CASP1 | CASP1 | MYD88 | DIABLO | PRKCQ |
| CASP5 | CASP5 | FADD | BAX | ROCK1 |
| TP53 | TP53 | CFLAR | BIK | PSME4 |
| CHMP7 | CHMP7 | RIPK1 | IL1A | ARHGAP10 |
| IL18 | IL18 | BAD | BID | TP63 |
| CASP3 | CASP3 | IRAK4 | CDKN1A | TP73 |
| CHMP4C | CHMP4C | BID | GADD45A | PKP1 |
| IRF2 | IRF2 | BAX | DDIT3 | BAX |
| CYCS | CYCS | IKBKB | CDKN1B | PSMC5 |
| CHMP6 | CHMP6 | CASP6 | TNF | ADD1 |
| HMGB1 | HMGB1 | IL1A | GSN | DNM1L |
| CASP4 | CASP4 | AKT1 | TNFSF10 | PPP1R13B |
| ELANE | ELANE | CASP3 | CASP6 | DYNLL1 |
| CHMP4A | CHMP4A | AKT2 | SQSTM1 | PSME1 |
| CASP9 |  | TNFRSF1A | FASLG | CLSPN |
| DFFA |  | AKT3 | EGR3 | PSMD5 |
| CASP7 |  | CHP2 | CD44 | DSP |
| CFLAR |  | ATM | FAS | PSMD8 |
| BIRC3 |  | ENDOG | IL18 | MAPK1 |
| PMAIP1 |  | NFKB1 | IGFBP6 | GZMB |
| CASP8 |  | NFKBIA | PRF1 | PSMC6 |
| JUN |  | CAPN2 | DAP | PSMA3 |
| BCL2L11 |  | PIK3R5 | CCND1 | PSMC1 |
| MCL1 |  | IKBKG | BTG3 | PSMB5 |
| SPTAN1 |  | CAPN1 | F2R | ACIN1 |
| DIABLO |  | IL3RA | SATB1 | PSMA6 |
| BIK |  | IL3 | BNIP3L | PSME2 |
| BID |  | RELA | CASP4 | PSMA7 |
| CDKN1A |  | ENDOD1 | TNFRSF12A | E2F1 |
| GADD45A |  | APAF1 | CREBBP | PSMD10 |
| DDIT3 |  | PRKX | RHOB | XIAP |
| CDKN1B |  | CSF2RB | GPX3 | BMX |
| TNF |  | TNFRSF10A | PDGFRB | STK24 |
| GSN |  | TRAF2 | TSPO | TRADD |
| TNFSF10 |  | TNFRSF10D | CCND2 | MAPK3 |
| CASP6 |  | NGF | XIAP | PSMD7 |
| SQSTM1 |  | TNFRSF10B | TIMP1 | TJP1 |
| FASLG |  | TNFRSF10C | CTNNB1 | BMF |
| EGR3 |  | MAP3K14 | IRF1 | GSDMD |
| CD44 |  | IL1RAP | HSPB1 | TNFRSF10A |
| FAS |  | IL1B | ADD1 | AKT2 |
| IGFBP6 |  | IRAK2 | TIMP2 | BBC3 |
| PRF1 |  | IL1R1 | BTG2 | CARD8 |
| DAP |  | IRAK1 | TIMP3 | GSDME |
| CCND1 |  | TRADD | LEF1 | PSMA2 |
| BTG3 |  | PIK3R3 | CASP1 | MAPK8 |
| F2R |  | BCL2 | GPX1 | UNC5B |
| SATB1 |  | BCL2L1 | BCL10 | PSMD3 |
| BNIP3L |  | BIRC2 | IGF2R | SEPTIN4 |
| TNFRSF12A |  | IRAK3 | CDC25B | KPNB1 |
| CREBBP |  | PRKACA | AIFM3 | C1QBP |
| RHOB |  | PRKACB | CD38 | PSMD11 |
| GPX3 |  | PRKACG | PPP3R1 | YWHAE |
| PDGFRB |  | PPP3CB | HGF | BIRC2 |
| TSPO |  | TP53 | CLU | PSMD9 |
| CCND2 |  | PPP3CA | ATF3 | LMNB1 |
| XIAP |  | PIK3CA | LGALS3 | UNC5A |
| TIMP1 |  | PIK3CB | LUM | KPNA1 |
| CTNNB1 |  | FAS | LMNA | TFDP2 |
| HSPB1 |  | DFFA | GADD45B | PSMD14 |
| ADD1 |  | CYCS | CDK2 | AKT3 |
| TIMP2 |  | DFFB | IFNB1 | FASLG |
| BTG2 |  | PIK3CD | RETSAT | TJP2 |
| TIMP3 |  | PRKAR1A | SMAD7 | APAF1 |
| LEF1 |  | FASLG | SOD1 | TNFRSF10B |
| GPX1 |  | PRKAR2A | PTK2 | PPP3CC |
| BCL10 |  | PRKAR1B | ENO2 | TNFSF10 |
| IGF2R |  | EXOG | HMOX1 | H1-3 |
| CDC25B |  | PIK3CG | IER3 | H1-1 |
| AIFM3 |  | AIFM1 | BCL2L10 | PSMF1 |
| CD38 |  | NTRK1 | CD2 | PSMB2 |
| PPP3R1 |  | PIK3R1 | GCH1 | TRAF2 |
| HGF |  | PIK3R2 | MMP2 | TICAM1 |
| CLU |  | CHP1 | VDAC2 | SEM1 |
| ATF3 |  |  | TAP1 | YWHAH |
| LGALS3 |  |  | PLAT | PSMA1 |
| LUM |  |  | IFNGR1 | PSME3 |
| LMNA |  |  | APP | CASP9 |
| GADD45B |  |  | BRCA1 | YWHAQ |
| CDK2 |  |  | ROCK1 | STK26 |
| IFNB1 |  |  | PSEN1 | DSG3 |
| RETSAT |  |  | DCN | DSG1 |
| SMAD7 |  |  | PSEN2 | APC |
| SOD1 |  |  | SOD2 | DBNL |
| PTK2 |  |  | BMF | NMT1 |
| ENO2 |  |  | EREG | TLR4 |
| HMOX1 |  |  | KRT18 | PSMB7 |
| IER3 |  |  | TGFB2 | RIPK1 |
| BCL2L10 |  |  | RELA | UACA |
| CD2 |  |  | WEE1 | CASP6 |
| GCH1 |  |  | RARA | TP53 |
| MMP2 |  |  | CD14 | PMAIP1 |
| VDAC2 |  |  | CD69 | AKT1 |
| TAP1 |  |  | PEA15 | PSMB6 |
| PLAT |  |  | DNAJC3 | PSMA5 |
| IFNGR1 |  |  | CASP2 | TP53BP2 |
| APP |  |  | CTH | RPS27A |
| BRCA1 |  |  | PLCB2 | CDKN2A |
| ROCK1 |  |  | BMP2 | GSN |
| PSEN1 |  |  | HMGB2 | GAS2 |
| DCN |  |  | PLPPR4 | APIP |
| PSEN2 |  |  | H1-0 | UBC |
| SOD2 |  |  | TGFBR3 | BCL2L11 |
| BMF |  |  | EBP | LY96 |
| EREG |  |  | TXNIP | PSMA8 |
| KRT18 |  |  | ANKH | APPL1 |
| TGFB2 |  |  | RHOT2 | PSMD4 |
| RELA |  |  | CYLD | PSMB4 |
| WEE1 |  |  | GSTM1 | DFFA |
| RARA |  |  | GSR | LMNA |
| CD14 |  |  | BGN | PSMC2 |
| CD69 |  |  | BCL2L1 | OMA1 |
| PEA15 |  |  | GNA15 | PSMD6 |
| DNAJC3 |  |  | MGMT | PRKCD |
| CASP2 |  |  | PPT1 | HMGB2 |
| CTH |  |  | F2 | CASP3 |
| PLCB2 |  |  | IL6 | YWHAZ |
| BMP2 |  |  | SC5D | CASP7 |
| HMGB2 |  |  | IFITM3 | PSMC3 |
| PLPPR4 |  |  | RNASEL | YWHAB |
| H1-0 |  |  | EMP1 | DAPK3 |
| TGFBR3 |  |  | CAV1 | CTNNB1 |
| EBP |  |  | DNM1L | FADD |
| TXNIP |  |  | ANXA1 | H1-4 |
| ANKH |  |  | TOP2A | FNTA |
| RHOT2 |  |  | ISG20 | STAT3 |
| CYLD |  |  | SLC20A1 | PTK2 |
| GSTM1 |  |  | MADD | DFFB |
| GSR |  |  | PPP2R5B | AVEN |
| BGN |  |  | BCAP31 | YWHAG |
| BCL2L1 |  |  | ERBB3 | UBB |
| GNA15 |  |  | NEDD9 | CD14 |
| MGMT |  |  | SAT1 | BCL2L1 |
| PPT1 |  |  | PDCD4 | BCL2 |
| F2 |  |  | BCL2L2 | CYCS |
| IL6 |  |  | FEZ1 | PSMD1 |
| SC5D |  |  | ERBB2 | PSMD2 |
| IFITM3 |  |  | DNAJA1 | SFN |
| RNASEL |  |  | DAP3 | PLEC |
| EMP1 |  |  | DPYD | MAGED1 |
| CAV1 |  |  | NEFH | PAK2 |
| DNM1L |  |  | PAK1 | SATB1 |
| ANXA1 |  |  | FDXR | DIABLO |
| TOP2A |  |  | GPX4 | H1-5 |
| ISG20 |  |  | ETF1 | PSMD13 |
| SLC20A1 |  |  | CCNA1 | BCAP31 |
| MADD |  |  | GUCY2D | MAPT |
| PPP2R5B |  |  | AVPR1A | DCC |
| BCAP31 |  |  |  | H1-2 |
| ERBB3 |  |  |  | H1-0 |
| NEDD9 |  |  |  | HMGB1 |
| SAT1 |  |  |  | DAPK1 |
| PDCD4 |  |  |  | PSMD12 |
| BCL2L2 |  |  |  | SPTAN1 |
| FEZ1 |  |  |  | OCLN |
| ERBB2 |  |  |  | TFDP1 |
| DNAJA1 |  |  |  | OPA1 |
| DAP3 |  |  |  | PSMB8 |
| DPYD |  |  |  | PSMB10 |
| NEFH |  |  |  | PPP3R1 |
| PAK1 |  |  |  | UBA52 |
| FDXR |  |  |  | PSMB11 |
| GPX4 |  |  |  | PSMB9 |
| ETF1 |  |  |  | TICAM2 |
| CCNA1 |  |  |  | DYNLL2 |
| GUCY2D |  |  |  | PSMB3 |
| AVPR1A |  |  |  |  |
| CASP10 |  |  |  |  |
| CHUK |  |  |  |  |
| PRKAR2B |  |  |  |  |
| PPP3R2 |  |  |  |  |
| PPP3CC |  |  |  |  |
| MYD88 |  |  |  |  |
| FADD |  |  |  |  |
| RIPK1 |  |  |  |  |
| BAD |  |  |  |  |
| IRAK4 |  |  |  |  |
| IKBKB |  |  |  |  |
| AKT1 |  |  |  |  |
| AKT2 |  |  |  |  |
| TNFRSF1A |  |  |  |  |
| AKT3 |  |  |  |  |
| CHP2 |  |  |  |  |
| ATM |  |  |  |  |
| ENDOG |  |  |  |  |
| NFKB1 |  |  |  |  |
| NFKBIA |  |  |  |  |
| CAPN2 |  |  |  |  |
| PIK3R5 |  |  |  |  |
| IKBKG |  |  |  |  |
| CAPN1 |  |  |  |  |
| IL3RA |  |  |  |  |
| IL3 |  |  |  |  |
| ENDOD1 |  |  |  |  |
| APAF1 |  |  |  |  |
| PRKX |  |  |  |  |
| CSF2RB |  |  |  |  |
| TNFRSF10A |  |  |  |  |
| TRAF2 |  |  |  |  |
| TNFRSF10D |  |  |  |  |
| NGF |  |  |  |  |
| TNFRSF10B |  |  |  |  |
| TNFRSF10C |  |  |  |  |
| MAP3K14 |  |  |  |  |
| IL1RAP |  |  |  |  |
| IRAK2 |  |  |  |  |
| IL1R1 |  |  |  |  |
| IRAK1 |  |  |  |  |
| TRADD |  |  |  |  |
| PIK3R3 |  |  |  |  |
| BCL2 |  |  |  |  |
| BIRC2 |  |  |  |  |
| IRAK3 |  |  |  |  |
| PRKACA |  |  |  |  |
| PRKACB |  |  |  |  |
| PRKACG |  |  |  |  |
| PPP3CB |  |  |  |  |
| PPP3CA |  |  |  |  |
| PIK3CA |  |  |  |  |
| PIK3CB |  |  |  |  |
| DFFB |  |  |  |  |
| PIK3CD |  |  |  |  |
| PRKAR1A |  |  |  |  |
| PRKAR2A |  |  |  |  |
| PRKAR1B |  |  |  |  |
| EXOG |  |  |  |  |
| PIK3CG |  |  |  |  |
| AIFM1 |  |  |  |  |
| NTRK1 |  |  |  |  |
| PIK3R1 |  |  |  |  |
| PIK3R2 |  |  |  |  |
| CHP1 |  |  |  |  |
| PSMB1 |  |  |  |  |
| PSMC4 |  |  |  |  |
| VIM |  |  |  |  |
| DAPK2 |  |  |  |  |
| CDH1 |  |  |  |  |
| PSMA4 |  |  |  |  |
| DSG2 |  |  |  |  |
| PRKCQ |  |  |  |  |
| PSME4 |  |  |  |  |
| ARHGAP10 |  |  |  |  |
| TP73 |  |  |  |  |
| PKP1 |  |  |  |  |
| PSMC5 |  |  |  |  |
| PPP1R13B |  |  |  |  |
| DYNLL1 |  |  |  |  |
| PSME1 |  |  |  |  |
| CLSPN |  |  |  |  |
| PSMD5 |  |  |  |  |
| DSP |  |  |  |  |
| PSMD8 |  |  |  |  |
| MAPK1 |  |  |  |  |
| PSMC6 |  |  |  |  |
| PSMA3 |  |  |  |  |
| PSMC1 |  |  |  |  |
| PSMB5 |  |  |  |  |
| ACIN1 |  |  |  |  |
| PSMA6 |  |  |  |  |
| PSME2 |  |  |  |  |
| PSMA7 |  |  |  |  |
| E2F1 |  |  |  |  |
| PSMD10 |  |  |  |  |
| BMX |  |  |  |  |
| STK24 |  |  |  |  |
| MAPK3 |  |  |  |  |
| PSMD7 |  |  |  |  |
| TJP1 |  |  |  |  |
| BBC3 |  |  |  |  |
| CARD8 |  |  |  |  |
| PSMA2 |  |  |  |  |
| MAPK8 |  |  |  |  |
| UNC5B |  |  |  |  |
| PSMD3 |  |  |  |  |
| SEPTIN4 |  |  |  |  |
| KPNB1 |  |  |  |  |
| C1QBP |  |  |  |  |
| PSMD11 |  |  |  |  |
| YWHAE |  |  |  |  |
| PSMD9 |  |  |  |  |
| LMNB1 |  |  |  |  |
| UNC5A |  |  |  |  |
| KPNA1 |  |  |  |  |
| TFDP2 |  |  |  |  |
| PSMD14 |  |  |  |  |
| TJP2 |  |  |  |  |
| H1-3 |  |  |  |  |
| H1-1 |  |  |  |  |
| PSMF1 |  |  |  |  |
| PSMB2 |  |  |  |  |
| TICAM1 |  |  |  |  |
| SEM1 |  |  |  |  |
| YWHAH |  |  |  |  |
| PSMA1 |  |  |  |  |
| PSME3 |  |  |  |  |
| YWHAQ |  |  |  |  |
| STK26 |  |  |  |  |
| DSG3 |  |  |  |  |
| DSG1 |  |  |  |  |
| APC |  |  |  |  |
| DBNL |  |  |  |  |
| NMT1 |  |  |  |  |
| TLR4 |  |  |  |  |
| PSMB7 |  |  |  |  |
| UACA |  |  |  |  |
| PSMB6 |  |  |  |  |
| PSMA5 |  |  |  |  |
| TP53BP2 |  |  |  |  |
| RPS27A |  |  |  |  |
| CDKN2A |  |  |  |  |
| GAS2 |  |  |  |  |
| APIP |  |  |  |  |
| UBC |  |  |  |  |
| LY96 |  |  |  |  |
| PSMA8 |  |  |  |  |
| APPL1 |  |  |  |  |
| PSMD4 |  |  |  |  |
| PSMB4 |  |  |  |  |
| PSMC2 |  |  |  |  |
| OMA1 |  |  |  |  |
| PSMD6 |  |  |  |  |
| PRKCD |  |  |  |  |
| YWHAZ |  |  |  |  |
| PSMC3 |  |  |  |  |
| YWHAB |  |  |  |  |
| DAPK3 |  |  |  |  |
| H1-4 |  |  |  |  |
| FNTA |  |  |  |  |
| STAT3 |  |  |  |  |
| AVEN |  |  |  |  |
| YWHAG |  |  |  |  |
| UBB |  |  |  |  |
| PSMD1 |  |  |  |  |
| PSMD2 |  |  |  |  |
| SFN |  |  |  |  |
| PLEC |  |  |  |  |
| MAGED1 |  |  |  |  |
| PAK2 |  |  |  |  |
| H1-5 |  |  |  |  |
| PSMD13 |  |  |  |  |
| MAPT |  |  |  |  |
| DCC |  |  |  |  |
| H1-2 |  |  |  |  |
| DAPK1 |  |  |  |  |
| PSMD12 |  |  |  |  |
| OCLN |  |  |  |  |
| TFDP1 |  |  |  |  |
| OPA1 |  |  |  |  |
| PSMB8 |  |  |  |  |
| PSMB10 |  |  |  |  |
| UBA52 |  |  |  |  |
| PSMB11 |  |  |  |  |
| PSMB9 |  |  |  |  |
| TICAM2 |  |  |  |  |
| DYNLL2 |  |  |  |  |
| PSMB3 |  |  |  |  |
| TRAF5 |  |  |  |  |
| RBCK1 |  |  |  |  |
| RNF31 |  |  |  |  |
| SHARPIN |  |  |  |  |
| SPATA2L |  |  |  |  |
| SPATA2 |  |  |  |  |
| RIPK3 |  |  |  |  |
| CYBB |  |  |  |  |
| CAMK2A |  |  |  |  |
| CAMK2D |  |  |  |  |
| CAMK2B |  |  |  |  |
| CAMK2G |  |  |  |  |
| SLC25A4 |  |  |  |  |
| SLC25A5 |  |  |  |  |
| SLC25A6 |  |  |  |  |
| SLC25A31 |  |  |  |  |
| PPID |  |  |  |  |
| VDAC1 |  |  |  |  |
| VDAC3 |  |  |  |  |
| GLUD2 |  |  |  |  |
| GLUD1 |  |  |  |  |
| GLUL |  |  |  |  |
| PYGL |  |  |  |  |
| PYGM |  |  |  |  |
| PYGB |  |  |  |  |
| MAPK10 |  |  |  |  |
| MAPK9 |  |  |  |  |
| FTH1 |  |  |  |  |
| FTL |  |  |  |  |
| PLA2G4E |  |  |  |  |
| PLA2G4A |  |  |  |  |
| JMJD7-PLA2G4B |  |  |  |  |
| PLA2G4B |  |  |  |  |
| PLA2G4C |  |  |  |  |
| PLA2G4D |  |  |  |  |
| PLA2G4F |  |  |  |  |
| ALOX15 |  |  |  |  |
| SMPD1 |  |  |  |  |
| MLKL |  |  |  |  |
| PGAM5 |  |  |  |  |
| NLRP3 |  |  |  |  |
| PYCARD |  |  |  |  |
| RNF103-CHMP3 |  |  |  |  |
| VPS4B |  |  |  |  |
| VPS4A |  |  |  |  |
| CHMP1B |  |  |  |  |
| CHMP1A |  |  |  |  |
| CHMP5 |  |  |  |  |
| TRPM7 |  |  |  |  |
| IL33 |  |  |  |  |
| FAF1 |  |  |  |  |
| IFNA1 |  |  |  |  |
| IFNA2 |  |  |  |  |
| IFNA4 |  |  |  |  |
| IFNA5 |  |  |  |  |
| IFNA6 |  |  |  |  |
| IFNA7 |  |  |  |  |
| IFNA8 |  |  |  |  |
| IFNA10 |  |  |  |  |
| IFNA13 |  |  |  |  |
| IFNA14 |  |  |  |  |
| IFNA16 |  |  |  |  |
| IFNA17 |  |  |  |  |
| IFNA21 |  |  |  |  |
| IFNG |  |  |  |  |
| IFNAR1 |  |  |  |  |
| IFNAR2 |  |  |  |  |
| IFNGR2 |  |  |  |  |
| JAK1 |  |  |  |  |
| JAK2 |  |  |  |  |
| JAK3 |  |  |  |  |
| TYK2 |  |  |  |  |
| STAT1 |  |  |  |  |
| STAT2 |  |  |  |  |
| STAT4 |  |  |  |  |
| STAT5A |  |  |  |  |
| STAT5B |  |  |  |  |
| STAT6 |  |  |  |  |
| IRF9 |  |  |  |  |
| EIF2AK2 |  |  |  |  |
| TLR3 |  |  |  |  |
| ZBP1 |  |  |  |  |
| USP21 |  |  |  |  |
| HSP90AA1 |  |  |  |  |
| HSP90AB1 |  |  |  |  |
| TNFAIP3 |  |  |  |  |
| PARP2 |  |  |  |  |
| PARP3 |  |  |  |  |
| PARP4 |  |  |  |  |
| H2AX |  |  |  |  |
| H2AC20 |  |  |  |  |
| H2AC12 |  |  |  |  |
| H2AC1 |  |  |  |  |
| H2AW |  |  |  |  |
| H2AB3 |  |  |  |  |
| H2AC8 |  |  |  |  |
| H2AC4 |  |  |  |  |
| MACROH2A2 |  |  |  |  |
| MACROH2A1 |  |  |  |  |
| H2AC19 |  |  |  |  |
| H2AJ |  |  |  |  |
| H2AB1 |  |  |  |  |
| H2AC17 |  |  |  |  |
| H2AC18 |  |  |  |  |
| H2AC11 |  |  |  |  |
| H2AC21 |  |  |  |  |
| H2AZ2 |  |  |  |  |
| H2AC7 |  |  |  |  |
| H2AZ1 |  |  |  |  |
| H2AC15 |  |  |  |  |
| H2AC6 |  |  |  |  |
| H2AC13 |  |  |  |  |
| H2AC14 |  |  |  |  |
| H2AC16 |  |  |  |  |
| H2AB2 |  |  |  |  |
| PPIA |  |  |  |  |

**Supplemental Table S3** Multivariate Cox regression analysis results.

|  | **HR** | **HR.95L** | **HR.95H** | **pvalue** |
| --- | --- | --- | --- | --- |
| Female | Ref |  |  |  |
| Male | 1.1841 | 0.6687 | 2.0965 | 0.5621 |
| Age | 1.0044 | 0.9814 | 1.0280 | 0.7073 |
| High-risk | Ref |  |  |  |
| Low-risk | 0.3413 | 0.2249 | 0.5179 | 4.35E-07 |

**Supplementary Figure 1** Kapla-Meier survival curve of PANoptosis prognostic genes. **(A)** Kapla-Meier survival curve of TNFRSF12A high and low expression. **(B)** Kapla-Meier survival curve of DAPK2 high and low expression.**(C)** Kapla-Meier survival curve of UACA high and low expression. **(D)** Kapla-Meier survival curve of DSP high and low expression


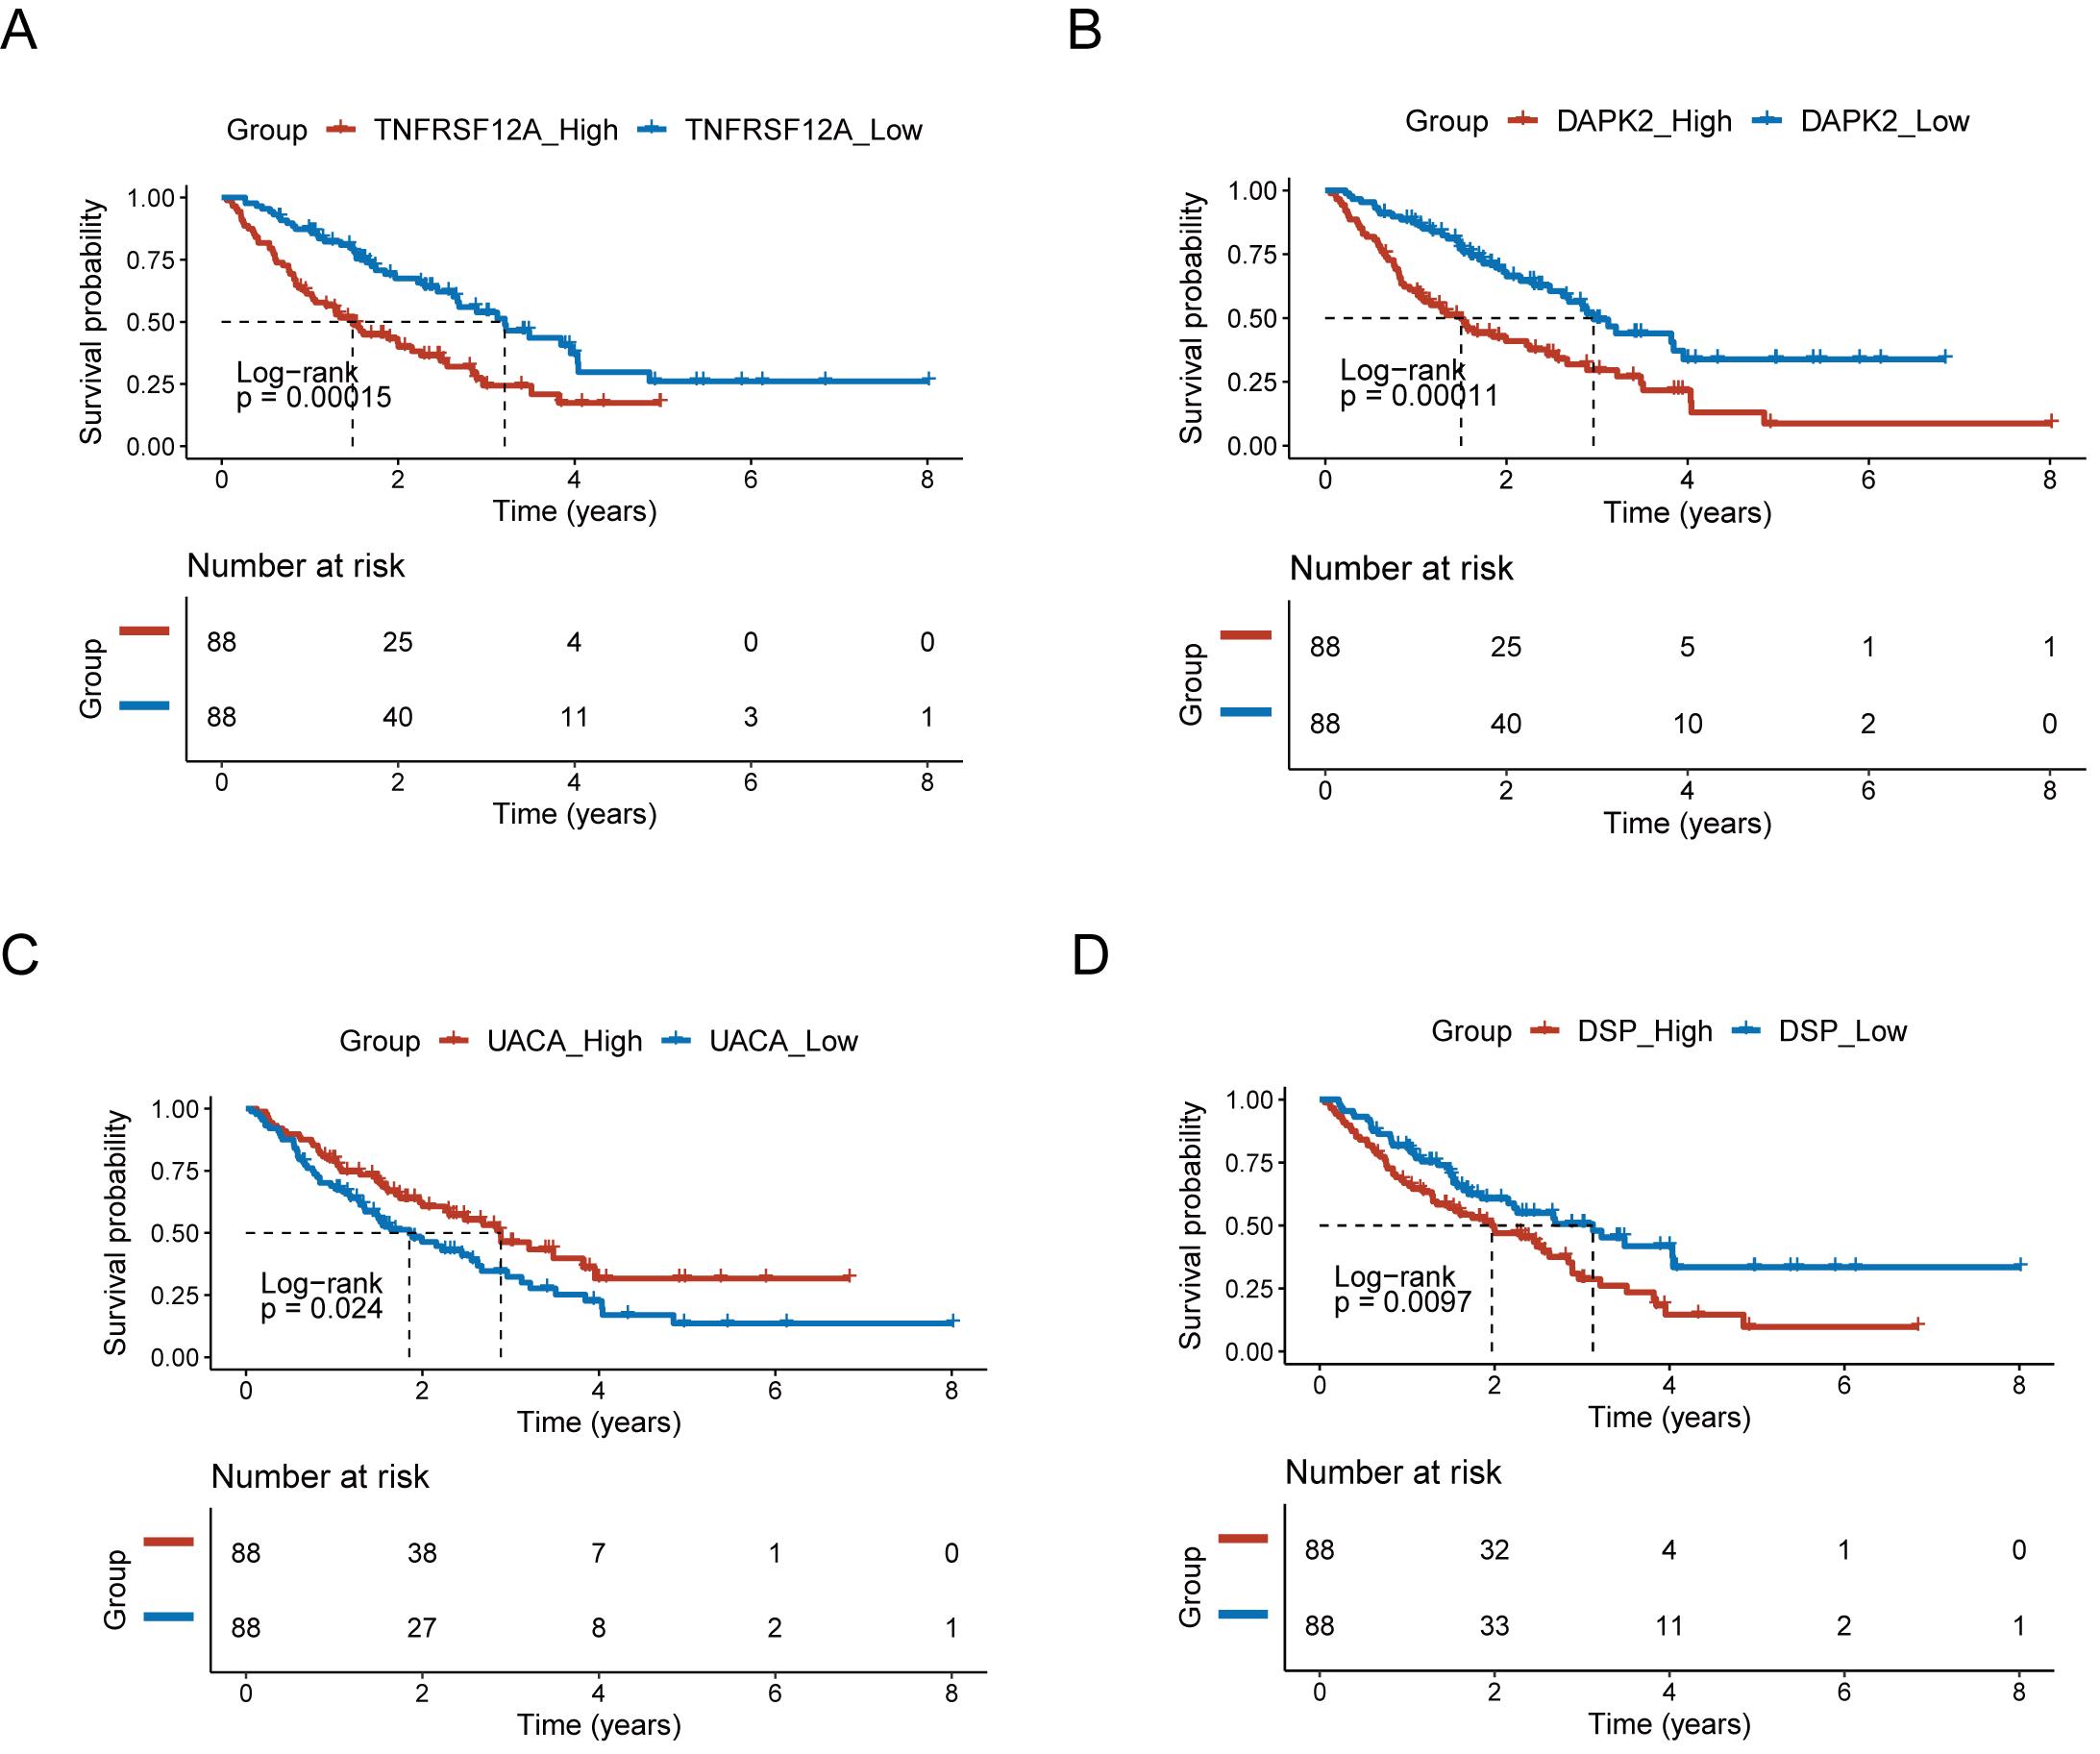

Supplement: Supplementary file 1 [file get_supplementary_file.php]
